# Supplementary material
Source: Frontiers journal article supplement (https://www.frontiersin.org/articles/357746)
Supplement: Data_Sheet_1.PDF [file Data_Sheet_1.PDF]

# Beyond calories: a holistic assessment of the global food system

## Supplementary Information

**Supplementary Table 1**

| <b>Commodity Group</b>         | <b>Commodities</b>                                                                                                                                                    |                                                                                                                      |
|--------------------------------|-----------------------------------------------------------------------------------------------------------------------------------------------------------------------|----------------------------------------------------------------------------------------------------------------------|
| <b>Cereals</b>                 | Wheat and products<br>Barley and products<br>Rye and products<br>Millet and products<br>Cereals, other                                                                | Rice (milled equivalent)<br>Maize and products<br>Oats<br>Sorghum and products                                       |
| <b>Roots and Tubers</b>        | Cassava and products<br>Sweet potatoes<br>Roots, other<br>Sugar beet                                                                                                  | Potatoes and products<br>Yams<br>Sugar cane                                                                          |
| <b>Pulses</b>                  | Beans<br>Pulses, other and products                                                                                                                                   | Peas                                                                                                                 |
| <b>Treenuts</b>                | Nuts and products                                                                                                                                                     |                                                                                                                      |
| <b>Oilcrops</b>                | Groundnuts (Shelled Eq)<br>Rape and Mustardseed<br>Coconuts - Incl Copra<br>Palm kernels<br>Oilcrops, Other                                                           | Soyabeans<br>Sunflower seed<br>Sesame seed<br>Olives (including preserved)                                           |
| <b>Fruits &amp; Vegetables</b> | Tomatoes and products<br>Vegetables, other<br>Lemons, Limes and products<br>Citrus, other<br>Plantains<br>Pineapples and products<br>Grapes and products (excl. wine) | Onions<br>Oranges, Mandarines<br>Grapefruit and products<br>Bananas<br>Apples and products<br>Dates<br>Fruits, other |
| <b>Stimulants</b>              | Tea (including mate)<br>Cocoa beans and products                                                                                                                      | Coffee and products                                                                                                  |
| <b>Meat and products</b>       | Bovine meat<br>Pigmeat<br>Meat, other<br>Butter, ghee<br>Fats, Animals, Raw<br>Milk – excluding butter                                                                | Mutton & goat meat<br>Poultry meat<br>Offals, edible<br>Cream<br>Eggs                                                |
| <b>Fish, Seafood</b>           | Freshwater fish<br>Pelagic fish<br>Crustaceans<br>Molluscs, other<br>Fish, body oil                                                                                   | Demersal fish<br>Marine fish, other<br>Cephalopods<br>Aquatic animals, others<br>Fish, liver oil                     |
| <b>Alcoholic beverages</b>     | Wine<br>Beverages, fermented                                                                                                                                          | Beer<br>Beverages, alcoholic                                                                                         |
| <b>Miscellaneous</b>           | Oilcakes                                                                                                                                                              |                                                                                                                      |

**Supplementary Table 1:** Food commodities included in this analysis, based on food items within the UN Food and Agriculture Organization (FAO) Statistical Database (<http://www.fao.org/faostat/en/>).

## Supplementary Table 2

| <b>Europe<br/>(inc. Russia)</b>      | <b>Agricultural<br/>production</b> | <b>Postharvest<br/>handling and<br/>storage</b> | <b>Processing<br/>and packaging</b> | <b>Distribution</b> | <b>Consumption</b> |
|--------------------------------------|------------------------------------|-------------------------------------------------|-------------------------------------|---------------------|--------------------|
| Cereals                              | 2%                                 | 4%                                              | 0.5%, 10%                           | 2%                  | 25%                |
| Roots and tubers                     | 20%                                | 9%                                              | 15%                                 | 7%                  | 17%                |
| Oilseeds and pulses                  | 10%                                | 1%                                              | 5%                                  | 1%                  | 4%                 |
| Fruits and vegetables                | 20%                                | 5%                                              | 2%                                  | 10%                 | 19%                |
| Meat                                 | 3.1%                               | 0.7%                                            | 5%                                  | 4%                  | 11%                |
| Fish and seafood                     | 9.4%                               | 0.5%                                            | 6%                                  | 9%                  | 11%                |
| Milk                                 | 3.5%                               | 0.5%                                            | 1.2%                                | 0.5%                | 7%                 |
| <b>North America and<br/>Oceania</b> | <b>Agricultural<br/>production</b> | <b>Postharvest<br/>handling and<br/>storage</b> | <b>Processing and<br/>packaging</b> | <b>Distribution</b> | <b>Consumption</b> |
| Cereals                              | 2%                                 | 2%                                              | 0.5%, 10%                           | 2%                  | 27%                |
| Roots and tubers                     | 20%                                | 10%                                             | 15%                                 | 7%                  | 30%                |
| Oilseeds and pulses                  | 12%                                | 0%                                              | 5%                                  | 1%                  | 4%                 |
| Fruits and vegetables                | 20%                                | 4%                                              | 2%                                  | 12%                 | 28%                |
| Meat                                 | 3.5%                               | 1.0%                                            | 5%                                  | 4%                  | 11%                |
| Fish and seafood                     | 12%                                | 0.5%                                            | 6%                                  | 9%                  | 33%                |
| Milk                                 | 3.5%                               | 0.5%                                            | 1.2%                                | 0.5%                | 15%                |
| <b>Latin America</b>                 | <b>Agricultural<br/>production</b> | <b>Postharvest<br/>handling and<br/>storage</b> | <b>Processing and<br/>packaging</b> | <b>Distribution</b> | <b>Consumption</b> |
| Cereals                              | 6%                                 | 4%                                              | 2%, 7%                              | 4%                  | 10%                |
| Roots and tubers                     | 14%                                | 14%                                             | 12%                                 | 3%                  | 4%                 |
| Oilseeds and pulses                  | 6%                                 | 3%                                              | 8%                                  | 2%                  | 2%                 |
| Fruits and vegetables                | 20%                                | 10%                                             | 20%                                 | 12%                 | 10%                |
| Meat                                 | 5.3%                               | 1.1%                                            | 5%                                  | 5%                  | 6%                 |
| Fish and seafood                     | 5.7%                               | 5%                                              | 9%                                  | 10%                 | 4%                 |
| Milk                                 | 3.5%                               | 6%                                              | 2%                                  | 8%                  | 4%                 |
| <b>South and<br/>Southeast Asia</b>  | <b>Agricultural<br/>production</b> | <b>Postharvest<br/>handling and<br/>storage</b> | <b>Processing and<br/>packaging</b> | <b>Distribution</b> | <b>Consumption</b> |
| Cereals                              | 6%                                 | 7%                                              | 3.5%                                | 2%                  | 3%                 |
| Roots and tubers                     | 6%                                 | 19%                                             | 10%                                 | 11%                 | 3%                 |
| Oilseeds and pulses                  | 7%                                 | 12%                                             | 8%                                  | 2%                  | 1%                 |
| Fruits and vegetables                | 15%                                | 9%                                              | 25%                                 | 10%                 | 7%                 |
| Meat                                 | 5.1%                               | 0.3%                                            | 5%                                  | 7%                  | 4%                 |
| Fish and seafood                     | 8.2%                               | 6%                                              | 9%                                  | 15%                 | 2%                 |
| Milk                                 | 3.5%                               | 6%                                              | 2%                                  | 10%                 | 1%                 |

| <b>North Africa, West and Central Asia</b> | <b>Agricultural production</b> | <b>Postharvest handling and storage</b> | <b>Processing and packaging</b> | <b>Distribution</b> | <b>Consumption</b> |
|--------------------------------------------|--------------------------------|-----------------------------------------|---------------------------------|---------------------|--------------------|
| Cereals                                    | 6%                             | 8%                                      | 2%, 7%                          | 4%                  | 12%                |
| Roots and tubers                           | 6%                             | 10%                                     | 12%                             | 4%                  | 6%                 |
| Oilseeds and pulses                        | 15%                            | 6%                                      | 8%                              | 2%                  | 2%                 |
| Fruits and vegetables                      | 17%                            | 10%                                     | 20%                             | 15%                 | 12%                |
| Meat                                       | 6.6%                           | 0.2%                                    | 5%                              | 5%                  | 8%                 |
| Fish and seafood                           | 6.6%                           | 5%                                      | 9%                              | 10%                 | 4%                 |
| Milk                                       | 3.5%                           | 6%                                      | 2%                              | 8%                  | 2%                 |
| <b>Sub-Saharan Africa</b>                  | <b>Agricultural production</b> | <b>Postharvest handling and storage</b> | <b>Processing and packaging</b> | <b>Distribution</b> | <b>Consumption</b> |
| Cereals                                    | 6%                             | 8%                                      | 3.5%                            | 2%                  | 1%                 |
| Roots and tubers                           | 14%                            | 18%                                     | 15%                             | 5%                  | 2%                 |
| Oilseeds and pulses                        | 12%                            | 8%                                      | 8%                              | 2%                  | 1%                 |
| Fruits and vegetables                      | 10%                            | 9%                                      | 25%                             | 17%                 | 5%                 |
| Meat                                       | 15%                            | 0.7%                                    | 5%                              | 7%                  | 2%                 |
| Fish and seafood                           | 5.7%                           | 6%                                      | 9%                              | 15%                 | 2%                 |
| Milk                                       | 6%                             | 11%                                     | 0.1%                            | 10%                 | 0.1%               |

**Supplementary Table 2: Loss and waste percentages by food chain stage and commodity group by region.** Due to poor data availability on food loss figures at the national level, regional average figures from the FAO<sup>2</sup> were applied to derive estimates of macronutrient losses at each stage in the global commodity chain.

Supplementary Table 3

|                                       | Infants        |              | Children     |              |                | Men            |              | Women          |                |                |              |           |           |
|---------------------------------------|----------------|--------------|--------------|--------------|----------------|----------------|--------------|----------------|----------------|----------------|--------------|-----------|-----------|
|                                       | 0-12<br>months | 1-3<br>years | 4-6<br>years | 7-9<br>years | 10-18<br>years | 19-65<br>years | 65+<br>years | 10-18<br>years | 19-50<br>years | 51-65<br>years | 65+<br>years | Pregnancy | Lactation |
| Percentage of<br>population           | 3.7%           | 5.4%         | 5.3%         | 6.8%         | 7.0%           | 28.3%          | 3.3%         | 6.6%           | 19.1%          | 6.4%           | 4.2%         | 1.9%      | 1.9%      |
| Weighted for<br>population >1<br>year | 0.00%          | 5.6%         | 5.5%         | 7.1%         | 7.3%           | 29.4%          | 3.5%         | 6.8%           | 19.9%          | 6.7%           | 4.3%         | 2.0%      | 2.0%      |

**Supplementary Table 3: Global population gender and age demographics.** Percentages of the global population within each age and gender grouping<sup>1</sup>. This study excludes infants <1 year old, hence percentages have also been normalised to those >1 year, to give a total percentage of 100%.

Supplementary Table 4

|                                                   | Infants        |           | Children  |           |                | Men            |              |                | Women          |                |              |           |           | Weighted<br>EAR |
|---------------------------------------------------|----------------|-----------|-----------|-----------|----------------|----------------|--------------|----------------|----------------|----------------|--------------|-----------|-----------|-----------------|
|                                                   | 0-12<br>months | 1-3 years | 4-6 years | 7-9 years | 10-18<br>years | 19-65<br>years | 65+<br>years | 10-18<br>years | 19-50<br>years | 51-65<br>years | 65+<br>years | Pregnancy | Lactation |                 |
| Iron<br>absorption<br>assumed<br>(%) <sup>1</sup> | -              | 5         | 5         | 5         | 5              | 5              | 5            | 5              | 8              | 8              | 8            | 8         | 8         |                 |
| Iron<br>(mg/day) <sup>1</sup>                     | -              | 6.4       | 9.3       | 11.4      | 22.9           | 13.1           | 13.1         | 16.9           | 13.1           | 13.1           | 13.1         | 29.2      | 17.9      | 13.8            |
| Calcium<br>(mg/day)                               | -              | 500       | 800       | 800       | 1100           | 800            | 1100         | 1100           | 800            | 1100           | 1100         | 1000      | 1000      | 877             |
| Zinc<br>(mg/day)                                  | -              | 2.5       | 4         | 7         | 8.5            | 9.4            | 9.4          | 7.3            | 6.8            | 6.8            | 6.8          | 10.5      | 10.9      | 9.6             |
| Vitamin<br>A<br>(µg/day)                          | -              | 286       | 321       | 357       | 429            | 429            | 429          | 429            | 357            | 357            | 429          | 571       | 607       | 397             |
| Vitamin<br>B <sub>6</sub><br>(mg/day)             | -              | 0.4       | 0.5       | 0.8       | 1.1            | 1.1            | 1.4          | 1              | 1.1            | 1.1            | 1.3          | 1.6       | 1.7       | 1.0             |
| Vitamin<br>B <sub>12</sub><br>(µg/day)            | -              | 0.7       | 1         | 1.5       | 2              | 2              | 2            | 1.5            | 2              | 2              | 2            | 2.2       | 2.4       | 1.8             |
| Folate<br>(mg/day)                                | -              | 120       | 160       | 250       | 330            | 320            | 320          | 250            | 330            | 320            | 320          | 520       | 450       | 299             |
| Vitamin<br>C<br>(mg/day)                          | -              | 13        | 22        | 22        | 63             | 75             | 75           | 56             | 60             | 60             | 60           | 70        | 100       | 58.4            |

**Supplementary Table 4: Daily Estimated Average Requirements (EAR) of key dietary vitamins and minerals.** Estimated Average Requirements (EAR) of key vitamins and minerals by age and gender demographics<sup>3</sup>. Weighted EAR values for the population are derived from global population distribution figures in Supplementary Table 3.

Supplementary Table 5

|                                        | Infants     |           | Children  |           |             | Men         |           | Women       |             |             |           |           |           |            |
|----------------------------------------|-------------|-----------|-----------|-----------|-------------|-------------|-----------|-------------|-------------|-------------|-----------|-----------|-----------|------------|
|                                        | 0-12 months | 1-3 years | 4-6 years | 7-9 years | 10-18 years | 19-65 years | 65+ years | 10-18 years | 19-50 years | 51-65 years | 65+ years | Pregnancy | Lactation | Weighted p |
| Isoleucine (mg/g protein)              | -           | 31        | 31        | 30        | 30          | 30          | 30        | 30          | 30          | 30          | 30        | 30        | 30        | 30.1       |
| Leucine (mg/g protein)                 | -           | 63        | 61        | 60        | 60          | 59          | 59        | 60          | 59          | 59          | 59        | 59        | 59        | 59.5       |
| Lysine (mg/g protein)                  | -           | 52        | 48        | 48        | 47          | 45          | 45        | 47          | 45          | 45          | 45        | 45        | 45        | 46.1       |
| Methionine +Cysteine (mg/g protein)    | -           | 26        | 24        | 23        | 23          | 22          | 22        | 23          | 22          | 22          | 22        | 22        | 22        | 22.5       |
| Phenylalanine +Tyrosine (mg/g protein) | -           | 46        | 41        | 41        | 40          | 38          | 38        | 40          | 38          | 38          | 38        | 38        | 38        | 39.1       |
| Threonine (mg/g protein)               | -           | 27        | 25        | 25        | 24          | 23          | 23        | 24          | 23          | 23          | 23        | 23        | 23        | 23.6       |
| Tryptophan (mg/g protein)              | -           | 7.4       | 6.6       | 6.5       | 6.3         | 6           | 6         | 6.3         | 6           | 6           | 6         | 6         | 6         | 6.2        |
| Valine (mg/g protein)                  | -           | 42        | 40        | 40        | 40          | 39          | 39        | 40          | 39          | 39          | 39        | 39        | 39        | 39.4       |
| Histidine (mg/g protein)               | -           | 18        | 16        | 16        | 16          | 15          | 15        | 16          | 15          | 15          | 15        | 15        | 15        | 15.4       |

**Supplementary Table 5: Daily relative requirements of essential amino acids per unit of protein.** Relative requirements of all essential amino acids (AA) per unit protein by age and gender demographics<sup>2</sup>. Weighted EAR values for the population are derived from global population distribution figures in Supplementary Table 3.

## Supplementary References

1. United Nations: Department of Social and Economic Affairs. *World population prospects: The 2012 revision, DVD edition*. Population Division 2013 (2013).
2. WHO/FAO/UNU Expert Consultation. *Protein and amino acid requirements in human nutrition*. World Health Organization Technical Report Series (2007). doi:ISBN 92 4 120935 6
3. World Health Organization. *Vitamin and mineral requirements in human nutrition*. World Health Organization (2005). doi:92 4 154612 3
4. FAO. *Global food losses and food waste – Extent, causes and prevention*. (2011)
